# Supplementary material for: Catalytic effects of nitrogen-doped graphene and carbon nanotube additives on hydrogen storage properties of sodium alanate
Source: Royal Society of Chemistry journal article supplement (doi:10.1039/c3ta01206a), 2013-01-01
Supplement: c3ta01206a.pdf [file c3ta01206a.pdf]

## **Catalytic Effect of Nitrogen-Doped Graphene and Carbon Nanotubes Additives on Hydrogen Storage Properties of Sodium Alanate**

**Lingam Hima Kumar\***, **Chitturi Venkateswara Rao** and **Balasubramanian Viswanathan\***  
National Centre for Catalysis Research, Department of Chemistry, Indian Institute of  
Technology Madras, Chennai – 600036, INDIA

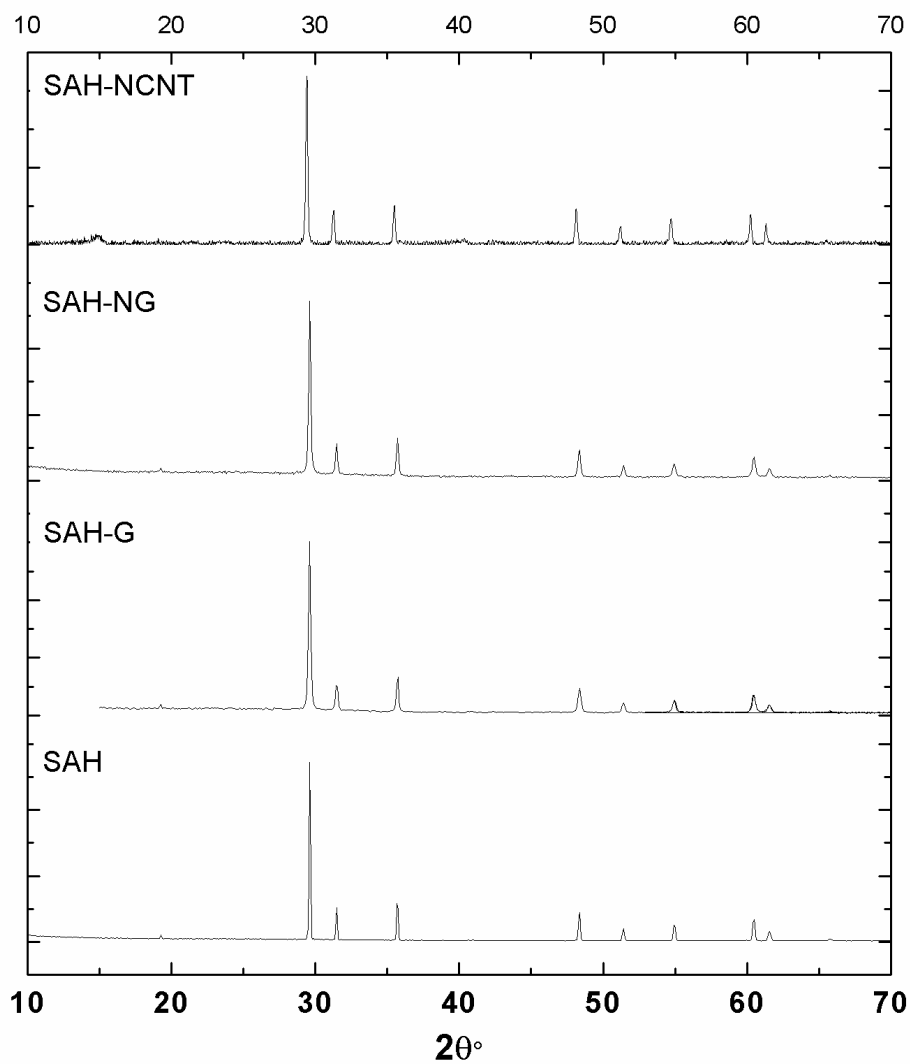

Figure S1. X-ray diffraction patterns of Sodium Aluminum hydride (SAH) and SAH-C composites (C = CNT, G, NCNT and NG)

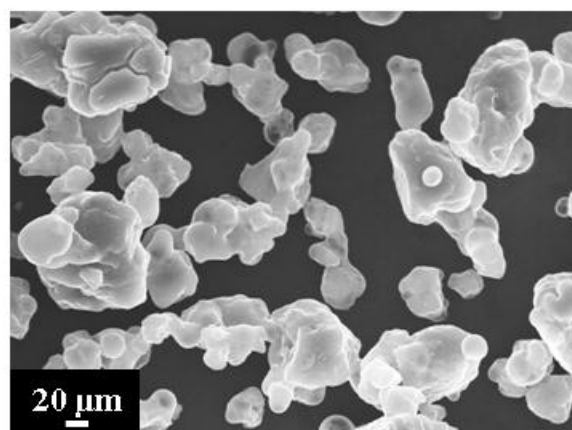

Figure S2. SEM image of pure Sodium Aluminum hydride (SAH)

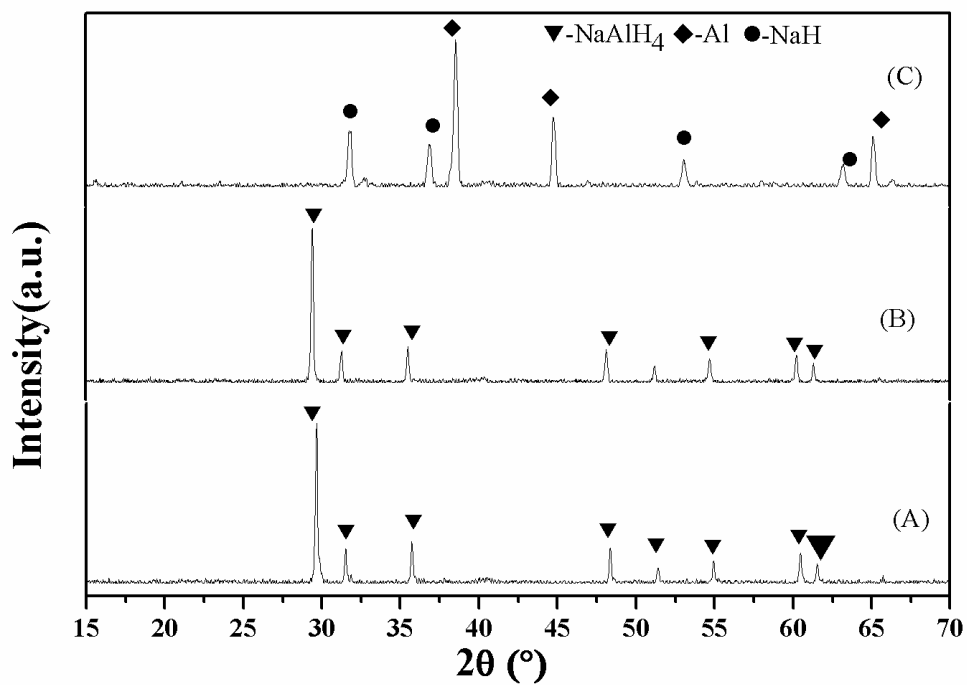

Figure S3. X-ray diffraction patterns of (A) SAH (B) SAH-NG and (C) SAH-NG decomposed at 220 °C.

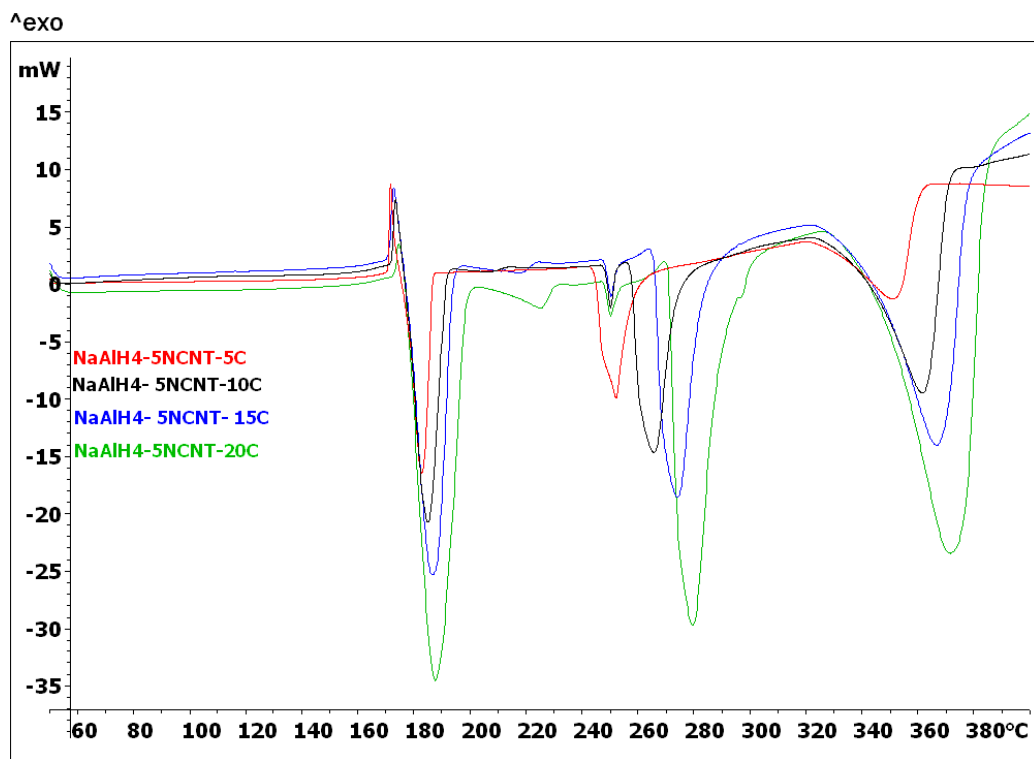

(A)

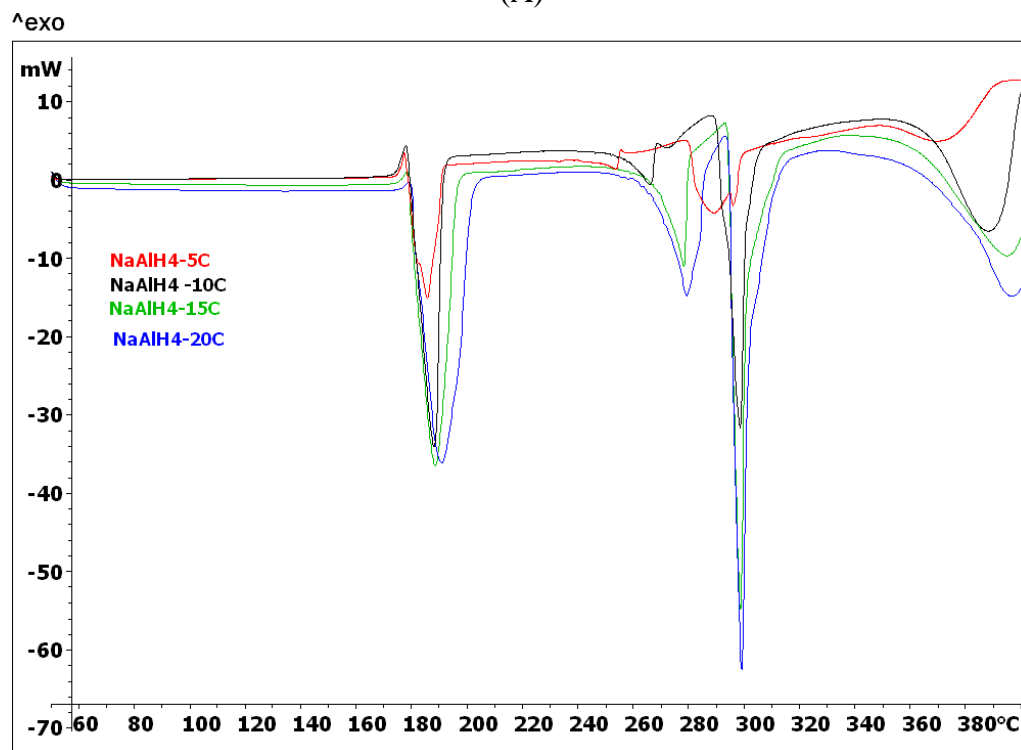

(B)

Figure S4. DSC traces of (A) SAH-NCNT (B) SAH with heating rates of 5, 10, 15 and 20 °C/min in Ar flow with the flow rate of 40 ml/min

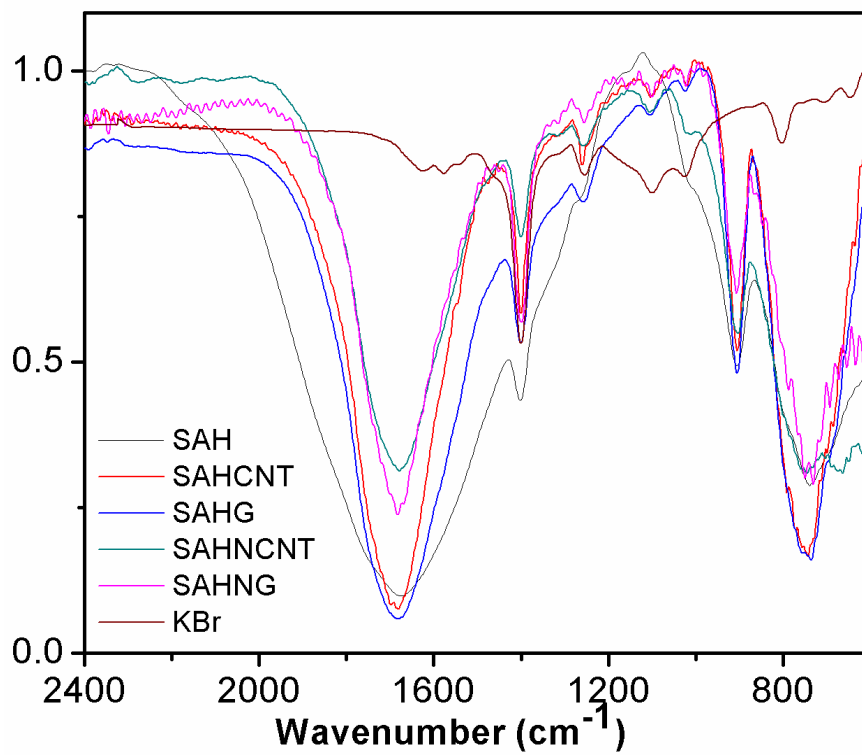

Figure S5. IR spectra of SAH and SAH-C composites in the frequency range of 2400 – 1200 cm<sup>-1</sup> ( peak at 1400 cm<sup>-1</sup> is due to the impurity from KBr , pure KBr IR spectrum included for comparison)

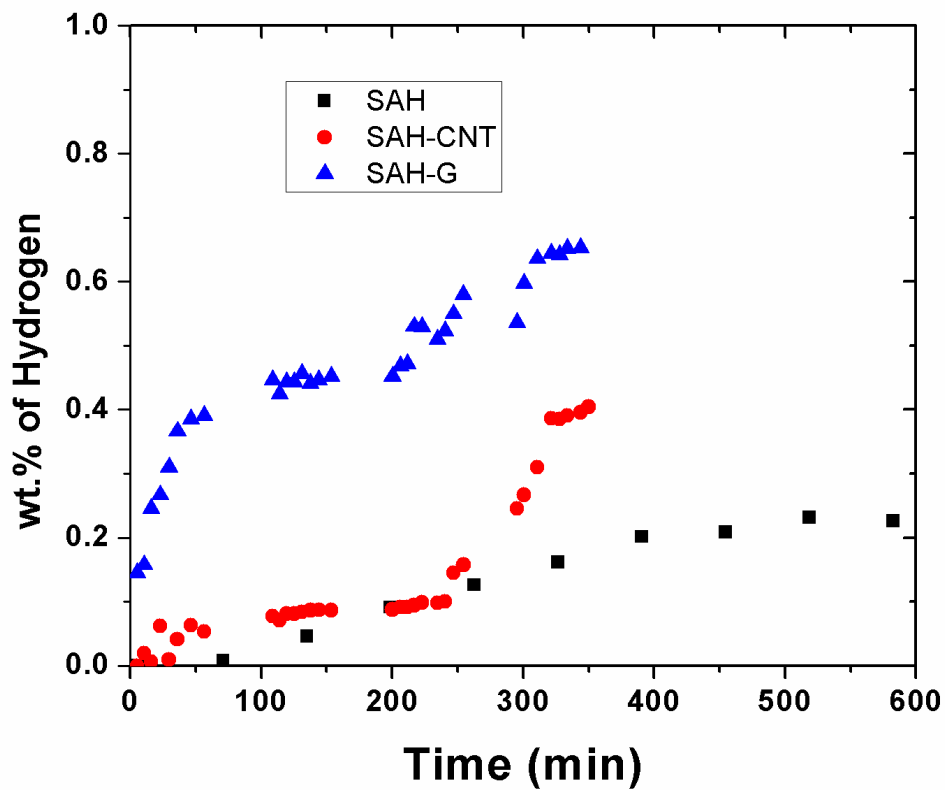

Figure S6. Rehydrogenation curves for SAH, SAH-NCNT, SAH-G @ 180 °C and 65 bar pressure.
